# Supplementary material
Source: PubMed Central journal article supplement (PMC10314174)
Supplement: mmc1.pdf [file mmc1.pdf]

Treatment-Emergent Adverse Events with Outcome of Death by System Organ Class and Preferred Term  
Safety Set

| System Organ Class<br>Preferred Term                                                              | Placebo<br>(N=100) |        |      | Nangibotide<br>1.0 mg/kg/h<br>(N=119) |        |     | Total<br>(N=219) |        |      |
|---------------------------------------------------------------------------------------------------|--------------------|--------|------|---------------------------------------|--------|-----|------------------|--------|------|
|                                                                                                   | n                  | (%)    | [E]  | n                                     | (%)    | [E] | n                | (%)    | [E]  |
| TOTAL NUMBER OF TREATMENT-EMERGENT ADVERSE EVENTS<br>WITH OUTCOME OF DEATH                        | 27                 |        |      | 19                                    |        |     | 46               |        |      |
| NUMBER OF PATIENTS WITH AT LEAST ONE<br>TREATMENT-EMERGENT ADVERSE EVENT WITH OUTCOME OF<br>DEATH | 27                 | (27.0) |      | 19                                    | (16.0) |     | 46               | (21.0) |      |
| RESPIRATORY, THORACIC AND MEDIASTINAL DISORDERS                                                   | 13                 | (13.0) | [13] | 9                                     | (7.6)  | [9] | 22               | (10.0) | [22] |
| ACUTE RESPIRATORY DISTRESS SYNDROME                                                               | 1                  | (1.0)  | [1]  | 1                                     | (0.8)  | [1] | 2                | (0.9)  | [2]  |
| ACUTE RESPIRATORY FAILURE                                                                         | 1                  | (1.0)  | [1]  | 0                                     |        |     | 1                | (0.5)  | [1]  |
| HAEMOTHORAX                                                                                       | 0                  |        |      | 1                                     | (0.8)  | [1] | 1                | (0.5)  | [1]  |
| HYPOXIA                                                                                           | 4                  | (4.0)  | [4]  | 3                                     | (2.5)  | [3] | 7                | (3.2)  | [7]  |
| PULMONARY EMBOLISM                                                                                | 0                  |        |      | 1                                     | (0.8)  | [1] | 1                | (0.5)  | [1]  |
| RESPIRATORY DISTRESS                                                                              | 0                  |        |      | 2                                     | (1.7)  | [2] | 2                | (0.9)  | [2]  |
| RESPIRATORY FAILURE                                                                               | 7                  | (7.0)  | [7]  | 1                                     | (0.8)  | [1] | 8                | (3.7)  | [8]  |
| INFECTIONS AND INFESTATIONS                                                                       | 6                  | (6.0)  | [6]  | 6                                     | (5.0)  | [6] | 12               | (5.5)  | [12] |
| COVID-19                                                                                          | 1                  | (1.0)  | [1]  | 1                                     | (0.8)  | [1] | 2                | (0.9)  | [2]  |
| SEPTIC SHOCK                                                                                      | 5                  | (5.0)  | [5]  | 5                                     | (4.2)  | [5] | 10               | (4.6)  | [10] |
| GENERAL DISORDERS AND ADMINISTRATION SITE<br>CONDITIONS                                           | 6                  | (6.0)  | [6]  | 0                                     |        |     | 6                | (2.7)  | [6]  |
| MULTIPLE ORGAN DYSFUNCTION SYNDROME                                                               | 6                  | (6.0)  | [6]  | 0                                     |        |     | 6                | (2.7)  | [6]  |
| NERVOUS SYSTEM DISORDERS                                                                          | 1                  | (1.0)  | [1]  | 2                                     | (1.7)  | [2] | 3                | (1.4)  | [3]  |
| BRAIN INJURY                                                                                      | 0                  |        |      | 1                                     | (0.8)  | [1] | 1                | (0.5)  | [1]  |
| CEREBRAL HAEMORRHAGE                                                                              | 0                  |        |      | 1                                     | (0.8)  | [1] | 1                | (0.5)  | [1]  |
| HAEMORRHAGIC STROKE                                                                               | 1                  | (1.0)  | [1]  | 0                                     |        |     | 1                | (0.5)  | [1]  |

At each level of patient summarization, a patient is counted once if the patient reported one or more events. [E] represents the number of events at each level of summarization. Adverse Events were coded using MedDRA, Version 23.0.

Source Data: Listing 11

Treatment-Emergent Adverse Events with Outcome of Death by System Organ Class and Preferred Term  
Safety Set

| System Organ Class<br>Preferred Term | Placebo<br>(N=100) |       |     | Nangibotide<br>1.0 mg/kg/h<br>(N=119) |       |     | Total<br>(N=219) |       |     |
|--------------------------------------|--------------------|-------|-----|---------------------------------------|-------|-----|------------------|-------|-----|
|                                      | n                  | (%)   | [E] | n                                     | (%)   | [E] | n                | (%)   | [E] |
| VASCULAR DISORDERS                   | 1                  | (1.0) | [1] | 2                                     | (1.7) | [2] | 3                | (1.4) | [3] |
| PERIPHERAL ISCHAEMIA                 | 0                  |       |     | 1                                     | (0.8) | [1] | 1                | (0.5) | [1] |
| SHOCK                                | 1                  | (1.0) | [1] | 1                                     | (0.8) | [1] | 2                | (0.9) | [2] |

At each level of patient summarization, a patient is counted once if the patient reported one or more events. [E] represents the number of events at each level of summarization. Adverse Events were coded using MedDRA, Version 23.0.  
Source Data: Listing 11

Treatment-Emergent Adverse Events with Outcome of Death by System Organ Class and Preferred Term  
Safety Set Patients with Baseline sTREM-1 Level Above or Equal to the Median

| System Organ Class<br>Preferred Term                                                              | Placebo<br>(N=55) |        |      | Nangibotide<br>1.0 mg/kg/h<br>(N=54) |        |     | Total<br>(N=109) |        |      |
|---------------------------------------------------------------------------------------------------|-------------------|--------|------|--------------------------------------|--------|-----|------------------|--------|------|
|                                                                                                   | n                 | (%)    | [E]  | n                                    | (%)    | [E] | n                | (%)    | [E]  |
| TOTAL NUMBER OF TREATMENT-EMERGENT ADVERSE EVENTS<br>WITH OUTCOME OF DEATH                        | 22                |        |      | 13                                   |        |     | 35               |        |      |
| NUMBER OF PATIENTS WITH AT LEAST ONE<br>TREATMENT-EMERGENT ADVERSE EVENT WITH OUTCOME OF<br>DEATH | 22                | (40.0) |      | 13                                   | (24.1) |     | 35               | (32.1) |      |
| RESPIRATORY, THORACIC AND MEDIASTINAL DISORDERS                                                   | 11                | (20.0) | [11] | 7                                    | (13.0) | [7] | 18               | (16.5) | [18] |
| ACUTE RESPIRATORY DISTRESS SYNDROME                                                               | 1                 | (1.8)  | [1]  | 1                                    | (1.9)  | [1] | 2                | (1.8)  | [2]  |
| ACUTE RESPIRATORY FAILURE                                                                         | 1                 | (1.8)  | [1]  | 0                                    |        |     | 1                | (0.9)  | [1]  |
| HYPOXIA                                                                                           | 3                 | (5.5)  | [3]  | 3                                    | (5.6)  | [3] | 6                | (5.5)  | [6]  |
| PULMONARY EMBOLISM                                                                                | 0                 |        |      | 1                                    | (1.9)  | [1] | 1                | (0.9)  | [1]  |
| RESPIRATORY DISTRESS                                                                              | 0                 |        |      | 2                                    | (3.7)  | [2] | 2                | (1.8)  | [2]  |
| RESPIRATORY FAILURE                                                                               | 6                 | (10.9) | [6]  | 0                                    |        |     | 6                | (5.5)  | [6]  |
| INFECTIONS AND INFESTATIONS                                                                       | 6                 | (10.9) | [6]  | 3                                    | (5.6)  | [3] | 9                | (8.3)  | [9]  |
| COVID-19                                                                                          | 1                 | (1.8)  | [1]  | 1                                    | (1.9)  | [1] | 2                | (1.8)  | [2]  |
| SEPTIC SHOCK                                                                                      | 5                 | (9.1)  | [5]  | 2                                    | (3.7)  | [2] | 7                | (6.4)  | [7]  |
| GENERAL DISORDERS AND ADMINISTRATION SITE<br>CONDITIONS                                           | 4                 | (7.3)  | [4]  | 0                                    |        |     | 4                | (3.7)  | [4]  |
| MULTIPLE ORGAN DYSFUNCTION SYNDROME                                                               | 4                 | (7.3)  | [4]  | 0                                    |        |     | 4                | (3.7)  | [4]  |
| NERVOUS SYSTEM DISORDERS                                                                          | 1                 | (1.8)  | [1]  | 2                                    | (3.7)  | [2] | 3                | (2.8)  | [3]  |
| BRAIN INJURY                                                                                      | 0                 |        |      | 1                                    | (1.9)  | [1] | 1                | (0.9)  | [1]  |
| CEREBRAL HAEMORRHAGE                                                                              | 0                 |        |      | 1                                    | (1.9)  | [1] | 1                | (0.9)  | [1]  |
| HAEMORRHAGIC STROKE                                                                               | 1                 | (1.8)  | [1]  | 0                                    |        |     | 1                | (0.9)  | [1]  |

At each level of patient summarization, a patient is counted once if the patient reported one or more events. [E] represents the number of events at each level of summarization. Adverse Events were coded using MedDRA, Version 23.0.

Source Data: Listing 11

Treatment-Emergent Adverse Events with Outcome of Death by System Organ Class and Preferred Term  
Safety Set Patients with Baseline sTREM-1 Level Above or Equal to the Median

| System Organ Class<br>Preferred Term | Placebo<br>(N=55) | Nangibotide<br>1.0 mg/kg/h<br>(N=54) |     | Total<br>(N=109) |
|--------------------------------------|-------------------|--------------------------------------|-----|------------------|
|                                      | n (%) [E]         | n (%) [E]                            |     | n (%) [E]        |
| VASCULAR DISORDERS                   | 0                 | 1 (1.9)                              | [1] | 1 (0.9) [1]      |
| PERIPHERAL ISCHAEMIA                 | 0                 | 1 (1.9)                              | [1] | 1 (0.9) [1]      |

At each level of patient summarization, a patient is counted once if the patient reported one or more events. [E] represents the number of events at each level of summarization. Adverse Events were coded using MedDRA, Version 23.0.  
Source Data: Listing 11
